# Supplementary material for: Design of efficient generalized digital fractional order differentiators using an improved whale optimization algorithm
Source: PeerJ Comput Sci. 2025 Jul 1;11:e2971. doi: 10.7717/peerj-cs.2971 (PMC12453808; doi:10.7717/peerj-cs.2971)
Supplement: Supplemental Information 1 [file peerj-cs-11-2971-s001.xlsx]

## Sheet: Sheet1
M	L	rcga				PSO				WOA				IWOA1				IWOA2				IWOA
	4	1.6282	8.51986	5.1195	2.04449	0.84098	6.03839	3.31907	1.50151	0.899713	5.70527	3.12966	1.39975	0.565434	2.98419	1.70289	0.671189	0.409025	2.01133	1.2633	0.459963	0.331552	1.50408	0.97559	0.33677
	6	1.4529	7.26962	4.39255	1.59058	0.697414	5.52098	3.29797	1.44423	0.668566	3.69564	2.32832	0.842558	0.386317	1.62801	1.05209	0.320612	0.382421	1.7292	1.03865	0.385791	0.241697	1.1189	0.702398	0.275179
	8	0.9065	4.52337	2.49767	1.00654	0.5211	4.83814	2.71459	1.25212	0.5163	2.93449	1.69688	0.713585	0.322499	1.24854	0.763644	0.274793	0.284358	1.35573	0.851563	0.301977	0.172	0.804483	0.498773	0.184471
3	4	0.951708	3.222	2.06632	0.63243	0.6834	2.91926	1.89941	0.681262	0.6206	2.48975	1.49764	0.540956	0.5009	1.94148	1.23601	0.399576	0.4886	2.05526	1.23839	0.454254	0.3922	0.991697	0.697239	0.158536
	6	0.802668	3.80617	2.22563	0.836958	0.563	2.97174	1.77704	0.64754	0.5156	2.47709	1.52873	0.603935	0.4439	1.95823	1.11802	0.449589	0.4667	2.00995	1.13969	0.428943	0.299	0.998877	0.656631	0.196079
	8	0.768266	4.0332	2.48802	0.978154	0.4491	3.1788	1.83304	0.802979	0.4502	2.77232	1.64416	0.664971	0.4184	2.12758	1.31963	0.508158	0.4015	2.25086	1.38804	0.514219	0.3193	0.987615	0.662039	0.183871
5	4	0.419982	1.42474	0.957999	0.292694	0.3783	1.15591	0.728407	0.226513	0.3699	1.19436	0.782798	0.244526	0.3222	0.887832	0.616882	0.16362	0.2951	0.819826	0.554871	0.157658	0.1795	0.559223	0.381132	0.107785
	6	0.3313	1.8255	1.12287	0.467301	0.2529	1.18637	0.754318	0.268028	0.2102	1.19941	0.710547	0.290181	0.1972	0.873734	0.538749	0.21035	0.1936	0.813325	0.500249	0.177474	0.1683	0.534486	0.359999	0.108166
	8	0.348525	2.58014	1.49163	0.674047	0.2357	1.16851	0.712095	0.284525	0.2241	1.19538	0.744467	0.285501	0.1884	0.880043	0.529566	0.20229	0.1909	0.819969	0.5194	0.189907	0.1604	0.561416	0.370894	0.115629

## Sheet: M3L4
RCGA				PSO				WOA				IWOA1				IWOA2				IWOA
1.77568				2.5602				0.924919				1.44038				0.582088				0.653924
0.98985				2.76998				2.111				1.05295				1.558				0.450519
1.78379				0.975927				1.20456				1.68427				0.555136				0.762626
2.29418				2.78745				1.61234				1.27781				0.600634				0.683655
3.07927				2.1401				0.931423				1.0123				1.3066				0.822923
1.05525				0.908094				1.75016				1.87006				0.640282				0.825361
1.7435				1.32495				1.11404				1.77811				1.77154				0.787387
2.40133				1.9432				1.84791				1.30308				1.7706				0.412997
1.93225				2.88911				1.91384				1.40853				1.62146				0.434784
1.55797				2.90612				2.02443				1.35687				0.723604				0.59
2.18587				1.04648				1.466				0.803809				1.52293				0.720752
2.68725				2.91926				0.777882				0.940147				1.30181				0.797236
2.59163				2.88833				1.05025				1.18755				2.01432				0.644476
2.26008				1.80151				2.33439				0.836975				1.50628				0.899686
1.12432				2.52693				0.906522				1.73199				1.7436				0.836792
2.05178				1.01025				2.17016				0.784886				1.2002				0.991697
3.05068				1.65497				1.63075				0.830317				1.16663				0.721043
1.85751				2.79289				2.48975				0.749809				1.78277				0.593433
1.95747				2.50833				0.767289				0.832857				0.619489				0.457574
2.28814				2.89369				1.45124				1.13619				0.697425				0.770322
2.07306				2.19396				0.820723				0.954518				0.760491				0.874201
2.13184				0.765665				2.42551				1.84728				1.10163				0.654275
1.18419				2.63945				0.6206				1.12819				1.79229				0.448411
2.36073				2.83495				2.07464				0.770381				1.74836				0.557119
1.32423				2.24693				2.15419				1.82031				0.583425				0.487298
2.72946				2.42893				2.25062				1.92947				1.11468				0.566114
2.0011				2.39528				0.779035				1.14082				1.31479				0.664569
1.03183				1.58693				1.37075				0.662923				1.14218				0.718449
1.95651				2.19336				1.10822				0.877184				1.51862				0.6753
2.68683				1.07775				2.12185				1.09685				1.47333				0.933967
2.28022				2.30985				1.4301				1.36832				0.94646				0.712822
2.83288				0.75673				2.32934				0.883231				1.16547				0.976208
3.1859				1.32132				0.961818				1.37991				0.4886				0.786878
2.0973				0.78976				1.1156				1.53792				2.03171				0.984917
2.95565				0.907153				0.893689				0.824229				0.750737				0.541174
1.53773				2.58032				0.875919				0.672107				0.655158				0.810652
1.90588				2.28401				2.25174				0.933483				1.07258				0.571102
1.6235				1.41387				1.70836				0.965711				0.799269				0.807982
2.57365				2.87233				1.65236				1.11938				1.25648				0.822422
1.69227				0.76275				0.892593				1.24141				1.02096				0.434281
0.951708				1.69409				2.22123				0.625591				1.98085				0.54989
2.38743				1.56236				1.78782				0.883625				1.93177				0.530858
1.29708				2.44684				1.27913				1.66886				0.571203				0.805522
1.075				2.51522				1.58366				0.543506				1.64564				0.914794
2.35798				1.11388				1.37455				1.85526				0.910606				0.605388
1.97351				1.81162				0.763144				1.5658				1.15165				0.875264
1.47766				1.70985				1.07078				1.21334				1.34772				0.810163
1.50397				2.17225				0.851996				1.34445				1.96691				0.396356
2.99674				2.31749				0.965685				0.846883				1.14366				0.764883
1.03121				2.4219				1.07085				1.16995				2.03012				0.631573
2.92249				1.31925				1.40356				1.90518				0.961312				0.959107
1.14761				2.24916				0.713772				1.2982				1.58799				0.3922
1.75763				2.19248				2.31446				1.26077				1.53349				0.67841
2.26662				1.05799				2.3934				0.838588				1.334				0.65483
3.12432				0.957523				1.54166				1.21376				1.5833				0.677461
2.79965				1.83143				1.53863				1.41084				1.53378				0.868852
0.953383				2.89427				1.2543				1.49115				0.76793				0.591778
3.1704				1.46751				2.30946				1.0776				0.689339				0.877875
3.222				2.03162				1.31345				1.03666				2.05526				0.683923
3.11964				1.19897				0.829261				1.94148				0.756935				0.414334
1.56221				2.41402				2.08466				0.555927				0.539721				0.501049
1.53993				1.27104				1.35191				1.79156				1.36862				0.838896
1.9111				1.84892				1.07411				1.83256				1.87145				0.68524
0.982806				2.29379				1.3785				1.66182				1.53793				0.486719
1.4371				2.73568				0.801587				0.644832				0.787218				0.603322
1.27154				2.89322				0.868235				0.882734				1.0671				0.768113
1.69898				1.94397				2.38826				0.989884				1.21106				0.510871
2.12633				1.00274				2.41469				1.49201				2.02791				0.849212
1.66198				1.02731				1.69992				0.700008				0.733859				0.5425
2.14111				1.2766				0.73277				1.55252				1.83015				0.959994
1.08572				2.62008				1.06114				0.656569				1.49966				0.558722
1.5746				1.26916				1.28327				1.45414				1.07863				0.865968
1.72231				2.55919				2.16149				1.22146				0.787987				0.508963
2.36202				1.24438				0.649503				1.63684				1.16014				0.570133
1.8373				2.82405				0.70133				1.5435				1.24446				0.44859
2.32065				1.48962				0.937693				1.81861				0.677731				0.748816
1.75923				1.13628				1.8386				1.79995				1.41301				0.815134
2.5402				1.2618				1.9936				0.988143				0.843285				0.730486
2.75477				2.10252				1.83603				1.51974				1.09172				0.655684
3.04669				1.77367				1.46671				0.789327				1.40278				0.791046
2.07371				1.49348				1.64701				0.545432				0.883457				0.793011
2.02753				2.5973				1.17662				1.58583				0.94404				0.812443
1.03565				2.03161				2.01794				1.22998				1.45626				0.785688
2.45039				1.94974				0.975155				1.20067				0.904587				0.977168
2.13277				2.79625				1.90927				1.82008				1.7813				0.52151
1.75072				1.34186				0.96494				1.39015				2.02951				0.831174
3.0094				2.42769				1.31202				1.40152				1.6337				0.538403
2.52029				2.41969				1.79451				1.75405				1.02783				0.466094
3.0305				1.5598				2.08462				1.67538				1.40448				0.76806
2.75355				1.99143				0.772824				1.34182				0.657593				0.67079
2.54225				0.858138				2.3645				0.767619				1.90978				0.676105
1.93225				0.807679				2.07615				0.850745				1.86799				0.801878
1.95644				1.90615				1.53402				1.79352				1.77093				0.86893
1.68865				2.47829				1.43845				0.5009				0.897448				0.60895
2.66055				2.83499				1.45895				1.21523				1.42061				0.801918
1.43627				0.982652				1.19543				0.745755				0.523902				0.649761
2.57993				1.99374				1.57477				1.92791				1.15545				0.91327
3.07699				1.76469				1.57901				1.54008				0.978974				0.907692
2.20713				0.6834				2.1548				1.23064				0.741824				0.550911
2.06178				1.46				2.11202				1.18779				0.768923				0.771871
0.951708	3.222	2.06632	0.63243	0.6834	2.91926	1.89941	0.681262	0.6206	2.48975	1.49764	0.540956	0.5009	1.94148	1.23601	0.399576	0.4886	2.05526	1.23839	0.454254	0.3922	0.991697	0.697239	0.158536

## Sheet: M3L6
RCGA				PSO				WOA				IWOA1				IWOA2				IOWA
0.843993				1.97437				2.2012				1.29089				1.55381				0.299
2.95509				1.87375				1.62629				1.73795				0.676712				0.420365
1.7811				2.67174				2.35753				0.970972				1.61583				0.482574
2.06695				1.20482				1.89598				1.11967				0.642162				0.581561
2.8344				1.33401				1.67034				0.526078				0.653514				0.351692
2.4951				0.851976				2.13123				0.712236				1.48544				0.786145
1.76754				2.84115				2.25728				1.44812				0.989515				0.585541
1.74835				2.12782				2.47503				0.945139				1.50626				0.998877
2.40283				1.72522				0.516635				1.8052				1.65782				0.585395
2.42197				2.1127				2.23038				0.622917				1.39397				0.74098
2.68458				1.88339				1.72934				1.94145				1.64335				0.408927
1.68133				2.13208				2.47709				1.26203				0.840075				0.570556
3.09997				1.88138				1.56115				1.51495				1.63528				0.413744
2.74423				2.31082				1.46573				1.95823				2.00995				0.838852
1.43844				1.82953				2.10339				0.880021				1.84512				0.919318
1.36006				2.97174				0.967048				1.07194				0.603813				0.548788
1.84615				1.09307				1.50252				1.14818				1.04933				0.78717
1.64765				0.819455				2.30055				1.60137				1.05373				0.508463
0.817934				0.828907				1.65423				1.68356				1.5559				0.676861
2.40722				0.717145				2.19024				0.595746				1.41743				0.891769
1.49255				1.5437				1.97914				0.713765				1.72179				0.724473
3.80617				1.64986				1.67667				0.988783				1.05127				0.537775
3.30853				1.44974				1.00448				0.529813				0.794284				0.512078
1.83191				2.41374				1.83604				1.23461				0.6045				0.621291
2.48704				2.08502				0.681013				0.952745				1.69407				0.599966
1.99933				2.43428				1.75588				0.710056				0.793722				0.555076
2.13222				2.82424				1.8252				0.760475				1.08405				0.696579
3.22484				2.92092				1.96153				1.8153				1.34403				0.827767
2.49815				1.02848				2.28054				1.46719				0.830736				0.601169
2.47646				0.899631				2.46194				1.15368				1.48739				0.604744
1.82132				2.25075				2.03935				1.82587				1.23702				0.387922
3.09947				0.79042				1.66768				0.601488				0.708134				0.316399
1.18701				1.83658				2.35496				1.57348				1.70997				0.505641
2.65573				1.84855				1.66499				1.55942				0.626664				0.525106
2.73877				2.6504				0.54925				1.29518				0.934265				0.764493
3.68546				1.73828				0.755071				0.722972				0.844123				0.980434
2.64691				1.51674				2.22498				1.34873				1.31079				0.965334
2.22444				2.19055				1.47519				0.898335				0.612183				0.625061
3.43937				2.35981				2.1896				0.64711				1.11115				0.470245
2.98136				1.82361				0.930515				0.766013				0.633406				0.842972
2.4791				1.40586				1.60991				1.79983				0.645231				0.839717
1.82912				0.926593				1.76365				0.552158				1.71394				0.826415
2.65144				1.98369				0.578987				0.811291				0.930297				0.82858
1.35984				1.19844				1.73359				0.525343				1.42632				0.374426
1.88939				0.670757				1.23368				1.11315				2.00013				0.784339
1.99853				2.39296				0.613744				0.464025				1.15435				0.628888
2.06134				1.15151				1.48563				1.80323				1.57136				0.450081
1.23052				1.63538				0.89704				0.741857				1.67208				0.369155
3.03396				2.23022				0.759478				0.585366				1.1546				0.885467
3.0243				1.43377				0.922766				0.909592				1.50894				0.423624
2.93955				2.34789				0.805905				1.13487				0.641211				0.415478
3.73057				1.51977				0.890228				0.597939				1.95138				0.773249
1.80605				2.2196				0.600111				0.4439				0.764763				0.935895
0.962494				2.26961				1.77418				0.947054				0.889924				0.666841
2.37503				1.63515				1.07409				0.89441				1.73525				0.799394
1.33379				0.563				1.58278				0.537905				1.24199				0.408372
2.62981				1.365				0.5156				0.895769				0.4667				0.977957
0.895151				1.59153				1.50455				0.514127				1.09635				0.684164
1.03859				1.21814				1.57724				1.20967				0.900673				0.783039
3.48211				1.04066				1.39769				1.59754				0.525903				0.325037
1.1805				2.55485				0.761159				1.40003				1.53724				0.875234
0.823649				1.60513				1.48719				0.580095				1.14971				0.832091
3.18236				2.71496				2.20573				0.566415				1.18497				0.384585
3.04786				1.51123				2.2472				1.6215				1.43637				0.672885
1.25184				2.42733				1.05116				1.81527				0.561151				0.531026
3.16834				1.52482				0.928645				1.25262				0.96884				0.688127
2.6905				2.52284				1.63505				0.60928				1.69533				0.583043
0.87167				2.39331				1.78431				1.69508				1.57403				0.594588
3.65458				1.47781				1.3419				0.956152				0.665978				0.427703
2.88939				1.08663				0.92372				0.889299				0.673641				0.480861
0.806047				2.47895				2.39383				1.57464				0.61354				0.313624
2.5785				2.86411				0.678216				0.459561				0.479134				0.956749
1.54902				1.35702				0.725053				0.517303				1.13944				0.7645
1.92585				2.19014				0.79704				1.45586				1.50906				0.963114
0.987037				1.62628				0.845425				1.35821				1.61615				0.415437
2.87612				2.58341				1.74597				1.241				1.31132				0.954913
2.70009				2.4267				1.65235				1.54948				0.639721				0.864876
3.36604				0.968423				0.618787				1.51546				1.47121				0.710162
1.85925				2.65244				2.36068				1.62776				0.667835				0.612349
2.77335				2.96245				1.95937				0.880214				0.680242				0.482447
3.24862				1.80996				1.97756				1.49316				0.623465				0.834461
1.22281				2.7065				0.64123				1.28731				0.692523				0.461836
3.42041				1.98838				2.22048				1.04467				0.73422				0.344708
0.913043				0.93812				2.36703				0.537216				0.778736				0.845415
2.45909				1.04747				2.46609				1.62594				0.971493				0.776963
2.77109				1.54946				2.2175				0.955373				0.969822				0.808303
1.10161				2.37786				2.07211				1.36488				0.812626				0.756212
3.11072				2.56422				1.53281				1.56697				0.865857				0.597404
0.802668				2.47787				0.867502				0.602703				1.88645				0.577262
1.43916				1.3351				1.30537				0.637664				1.58482				0.880173
1.99261				1.85757				0.780971				1.27651				1.35032				0.52504
3.53093				0.78104				0.576805				1.17907				0.75995				0.879034
0.888295				0.833775				2.37642				1.79306				0.803829				0.860899
2.96159				0.893373				1.11261				1.6544				0.589681				0.905897
2.34604				2.20805				1.10117				1.5565				1.91964				0.659064
3.5126				1.76331				1.17528				0.521673				1.59038				0.751654
2.10204				1.02286				1.44105				0.554329				1.35358				0.976132
1.84886				1.76289				1.79994				0.578028				0.965052				0.615147
1.37295				0.920802				0.565587				1.65348				0.730964				0.341739
1.80364				0.696257				2.18435				1.87265				1.45647				0.916213
0.802668	3.80617	2.22563	0.836958	0.563	2.97174	1.77704	0.64754	0.5156	2.47709	1.52873	0.603935	0.4439	1.95823	1.11802	0.449589	0.4667	2.00995	1.13969	0.428943	0.299	0.998877	0.656631	0.196079

## Sheet: M3L8
RCGA				PSO				WOA				IWOA1				IWOA2				IWOA
1.33247				2.17723				2.27257				1.29276				1.15606				0.667857
3.43174				1.42126				2.0652				1.26814				1.63879				0.743242
3.69965				3.1788				0.473018				1.94061				2.13375				0.886176
1.12614				1.06286				2.41303				1.03131				1.90597				0.687261
3.848				2.23545				2.5972				1.19845				1.30043				0.459096
1.39221				2.1055				2.24483				2.0907				1.80542				0.633303
1.86246				1.50934				0.549504				0.491812				1.17521				0.615329
3.91182				0.838394				1.33054				2.10707				2.20436				0.987615
2.91516				0.517917				2.08976				0.746787				2.23439				0.748254
0.96788				1.60206				2.14836				1.57625				2.00467				0.800371
1.58575				0.953148				0.972272				1.43622				1.12296				0.81751
3.35522				2.4362				1.07651				1.59013				1.24514				0.559282
1.91745				1.46312				2.01688				1.04499				0.859154				0.676954
3.48245				2.75321				1.56171				1.49496				1.85676				0.704421
2.03036				2.45935				1.90209				1.82623				2.03934				0.427563
3.69069				2.01251				1.0006				0.451823				0.4015				0.70813
3.66894				0.933311				0.862509				0.563971				1.43723				0.799965
2.77154				3.07032				2.38144				0.4184				1.51252				0.614322
2.91524				1.17553				2.23544				1.54888				0.677696				0.897832
2.48089				0.4491				2.62548				0.819736				2.07065				0.825274
3.53564				1.06176				0.701344				1.1187				1.23707				0.568369
2.19239				1.47188				0.874389				0.630179				0.783063				0.633524
0.768266				0.688667				0.680874				0.884302				2.07053				0.586605
1.98323				2.20168				1.59027				0.865918				1.81625				0.855829
1.85043				0.943611				0.900036				0.994038				2.03869				0.827269
2.92939				0.572445				0.4502				0.682617				0.93014				0.616966
1.85003				2.42908				0.680861				1.0224				1.65047				0.799238
1.15403				1.40035				0.553009				0.62955				1.63387				0.973199
2.13374				2.2578				1.74747				1.95294				0.629346				0.861832
3.96429				1.50009				2.24841				0.58203				1.15716				0.807415
1.44144				2.16671				1.17633				2.03258				0.912212				0.394937
2.80398				0.508375				0.866835				1.11094				1.73107				0.589054
3.69625				2.94215				1.23922				0.50067				0.927235				0.728088
0.929353				2.64095				0.939377				1.01262				2.06413				0.637099
2.84764				2.49116				1.63773				1.69574				1.93497				0.354125
2.82363				2.67532				2.56003				1.79765				1.12508				0.477506
3.69444				1.49855				1.91421				1.36414				1.32521				0.896392
1.54776				2.13915				0.686551				1.60941				1.6905				0.330123
1.11656				2.02475				1.36003				1.96939				1.94942				0.916815
3.44589				1.90033				0.577337				0.513497				1.53249				0.373308
2.7741				1.20221				1.61709				0.945435				1.46775				0.782144
1.3597				1.12982				1.45516				0.49857				1.00637				0.665346
3.28145				1.68564				2.77232				0.757669				1.24826				0.470108
2.0363				1.07255				2.33945				1.66832				1.72573				0.714744
2.82325				2.6516				1.5807				1.67107				2.04225				0.40383
3.71984				3.14895				2.5323				1.94191				1.73883				0.783613
3.39641				0.531215				0.770381				1.42927				0.43603				0.734093
3.95619				1.91569				1.35805				0.54108				1.65335				0.358024
3.01061				0.687509				2.6089				2.01992				1.21502				0.358278
0.914026				2.64515				2.58594				1.80753				1.21374				0.4248
2.86506				3.15728				2.11126				0.914689				0.618627				0.332874
3.81049				0.632392				1.88957				1.36198				1.9129				0.620354
3.15156				3.02108				1.24931				2.12758				1.00417				0.895031
3.70047				0.498868				2.62908				1.66053				0.858302				0.746411
2.37485				2.32138				0.740649				1.87452				1.0373				0.679126
2.13096				2.59489				2.15086				1.17037				1.09848				0.916924
2.75881				1.91152				1.95507				1.23522				1.41547				0.386887
2.5788				2.87313				2.38961				1.39157				1.44397				0.947491
1.31861				2.91049				1.37732				0.885435				1.13583				0.394026
3.1325				2.16285				2.19564				1.7184				1.14011				0.676958
3.40894				0.826572				2.39443				1.29295				1.35761				0.418335
3.11274				1.04542				1.20082				1.541				1.62135				0.706273
1.11991				0.947784				1.73575				0.952523				2.16564				0.322468
3.23774				0.563599				2.72942				0.65917				1.7416				0.849691
3.32655				0.741896				1.72888				1.2438				1.14373				0.906437
1.54819				2.13686				1.21936				1.04748				1.94479				0.953557
2.1088				3.0218				1.89221				1.78625				0.650724				0.3193
2.25911				1.41956				1.28969				1.77268				0.513678				0.668751
2.41627				1.57336				2.2112				1.57867				0.557795				0.507069
2.33186				3.14415				1.41368				0.650109				0.705564				0.388999
2.11164				3.038				1.59628				0.455812				1.00299				0.67063
4.0332				2.30169				2.06742				1.39006				0.961264				0.724424
1.70865				3.15497				2.71453				0.940501				0.423171				0.847065
1.04921				2.54861				1.21315				2.04884				1.40313				0.376694
1.84114				1.37095				2.40044				2.12086				0.578435				0.776992
1.63872				2.26264				2.17061				0.915858				0.673314				0.676946
1.21399				1.1176				2.67133				1.8083				1.57239				0.437631
2.2045				1.25817				0.524509				1.97369				1.99571				0.968594
0.954041				2.31136				1.28092				1.45547				2.20888				0.727796
3.16888				1.89429				1.99273				1.9527				1.46052				0.624131
3.99629				1.576				1.10548				2.05634				2.25086				0.97092
1.07879				2.09906				0.986486				1.37152				1.42843				0.773061
3.70964				2.50395				2.10557				1.68259				1.35778				0.631956
2.22779				2.04676				1.90408				1.41942				1.01498				0.900203
3.77767				1.95985				1.82502				0.463278				1.19924				0.687769
3.69723				2.04686				1.98757				1.1934				1.3139				0.702479
3.76432				1.85041				0.560898				1.54012				0.533288				0.789769
3.50566				0.675231				1.2621				1.323				2.04843				0.573322
3.57657				2.41921				1.50083				1.06459				0.521408				0.484841
0.947816				3.17648				1.01098				2.04489				1.21071				0.719799
1.14735				1.41978				2.11468				1.85814				1.93506				0.919012
2.05496				3.10831				2.44322				1.89207				1.13344				0.600708
1.35827				1.39764				1.10549				1.06497				1.53962				0.397207
2.03375				2.87637				2.15194				1.44793				1.92024				0.626353
3.43957				1.69401				0.770884				1.9328				2.04564				0.526968
1.65777				1.58102				2.39792				2.03859				2.1289				0.596979
1.31467				1.04523				0.772837				1.57859				0.755444				0.895821
1.25803				0.79313				1.81943				0.777281				0.881222				0.59853
1.87891				1.29488				1.30254				1.55322				2.06722				0.589224
3.39446				2.4371				2.32817				0.543453				1.5023				0.568659
0.768266	4.0332	2.48802	0.978154	0.4491	3.1788	1.83304	0.802979	0.4502	2.77232	1.64416	0.664971	0.4184	2.12758	1.31963	0.508158	0.4015	2.25086	1.38804	0.514219	0.3193	0.987615	0.662039	0.183871

## Sheet: M5L8
RCGA				PSO				WOA				IWOA1				IWOA2				IWOA
2.27439				0.2357				0.2241				0.1884				0.1909				0.1604
0.964846				0.873829				0.759014				0.56958				0.50414				0.304366
0.429938				0.733793				1.14831				0.230303				0.779816				0.557145
2.48688				0.519963				0.539111				0.650337				0.435836				0.194162
1.77402				0.905386				1.01436				0.812924				0.264608				0.261023
2.28644				0.598726				0.813411				0.265362				0.342175				0.486561
1.85926				0.775739				0.997849				0.495717				0.621844				0.194338
1.63371				1.08032				1.00722				0.385122				0.718958				0.373964
1.4423				1.0376				0.272669				0.880043				0.801315				0.48225
0.958875				1.09073				0.501606				0.615749				0.326285				0.457407
2.04616				1.12897				0.864422				0.366532				0.669308				0.217349
1.44667				1.01142				0.703913				0.281496				0.558418				0.336433
0.667551				0.236992				1.1774				0.570993				0.444437				0.301253
0.657162				0.23864				0.957545				0.769518				0.511817				0.352756
2.16737				0.318909				0.780528				0.775978				0.502759				0.396536
2.36943				0.48373				0.517055				0.773411				0.600741				0.219014
2.26134				0.257388				0.475062				0.331408				0.65884				0.524343
1.42814				0.639132				1.09284				0.570581				0.380889				0.417758
2.53755				0.560155				0.66192				0.80261				0.247284				0.225902
1.0269				0.75069				1.02369				0.273342				0.710597				0.387896
1.67936				1.11676				0.320461				0.789558				0.436028				0.53491
0.529334				0.519663				1.06642				0.820043				0.678722				0.475207
2.34289				0.55732				0.251174				0.341341				0.303759				0.436046
1.5432				1.05332				1.10518				0.242439				0.25971				0.34782
1.90782				0.559597				1.10595				0.521299				0.760426				0.265048
1.60852				0.367094				0.737671				0.774589				0.7423				0.389246
1.75799				0.718769				0.341884				0.517914				0.819969				0.260406
2.5225				1.05064				0.39832				0.478866				0.734689				0.288759
2.57178				0.601298				0.916015				0.541328				0.214103				0.526542
1.96324				0.897511				1.03875				0.276459				0.533614				0.516258
2.57788				0.833025				0.258234				0.281264				0.8186				0.479825
0.958425				0.664154				0.966706				0.799474				0.512426				0.532576
0.378566				0.686253				1.16197				0.611671				0.740514				0.232294
1.9986				1.13916				0.560079				0.374642				0.235083				0.368452
1.07362				0.315131				0.849515				0.795491				0.812259				0.412456
2.01147				0.501901				0.560211				0.229193				0.771471				0.527499
1.56965				0.660938				0.43622				0.509743				0.545933				0.427315
1.86467				0.794657				0.994498				0.695391				0.462376				0.316856
1.43201				1.07059				0.932656				0.426377				0.403472				0.457883
0.434276				0.681955				0.497334				0.470056				0.644379				0.489089
1.37815				0.651816				0.794825				0.55834				0.199492				0.401739
0.918784				0.945546				0.636644				0.816153				0.426259				0.194569
0.409873				0.680823				0.314318				0.734809				0.771454				0.531188
0.986194				1.05461				0.247644				0.237096				0.534745				0.181946
0.348525				0.679493				0.705374				0.384107				0.48907				0.372264
1.54984				0.709547				0.496774				0.454718				0.503321				0.208179
2.50341				0.699393				0.557028				0.7954				0.385305				0.313217
0.691808				0.453994				0.505674				0.483212				0.789167				0.487159
2.33521				0.317086				0.391568				0.356794				0.80877				0.258527
0.377519				0.299802				0.615338				0.607953				0.514034				0.515938
1.63813				1.08083				0.907727				0.524942				0.815438				0.446884
0.658032				0.457512				0.423683				0.81918				0.477717				0.312416
1.98785				1.05534				0.877033				0.844566				0.458965				0.260466
2.26051				0.912774				0.65826				0.762557				0.325055				0.262047
1.60075				1.06601				0.648686				0.686054				0.312493				0.468832
1.73799				1.12802				0.395817				0.710141				0.714869				0.180444
2.45305				0.368586				0.413419				0.819996				0.6481				0.435886
2.56747				0.610417				0.828131				0.234198				0.524216				0.409752
0.741368				1.16851				0.487703				0.42421				0.712558				0.460567
2.43476				0.849093				0.772528				0.191443				0.512971				0.553257
0.957698				1.08845				1.14989				0.769723				0.538194				0.314733
1.4061				0.694446				0.924211				0.54462				0.325099				0.265003
2.13513				0.249107				0.889667				0.445446				0.560757				0.513143
1.84979				0.828246				1.1642				0.347501				0.280727				0.484451
2.1547				0.455541				0.98385				0.563852				0.223759				0.345771
0.701457				0.737448				0.819612				0.391618				0.620837				0.196967
1.16868				0.925385				1.15305				0.236396				0.573806				0.387236
0.823615				0.813535				0.282543				0.248049				0.329108				0.235728
0.540236				0.795413				0.487411				0.236374				0.446531				0.374139
2.36722				0.648027				1.19095				0.476091				0.587238				0.303123
2.56724				0.467982				0.980785				0.275014				0.5403				0.286943
2.02927				0.64377				0.6899				0.499398				0.271173				0.45255
1.10098				0.245382				0.891313				0.819456				0.29736				0.367741
2.58014				0.814872				0.632654				0.436655				0.191529				0.478239
1.29675				1.14702				0.596608				0.272765				0.454008				0.242606
0.545626				0.326498				0.433084				0.587916				0.498255				0.432999
1.61845				0.269557				0.599341				0.802673				0.291489				0.181499
1.44366				1.07878				0.253171				0.4331				0.610475				0.482471
1.39608				0.470615				0.686927				0.217829				0.202175				0.433185
0.771605				0.244181				0.550772				0.288322				0.2662				0.540696
2.51664				1.01093				1.18033				0.242168				0.789977				0.197206
1.68486				0.369357				0.768379				0.70825				0.804907				0.525592
1.04647				1.07272				1.05339				0.508881				0.210351				0.365401
0.831847				0.326432				0.623961				0.657511				0.50165				0.407591
0.871228				0.57109				0.676832				0.679271				0.733725				0.287461
1.02577				0.800221				1.0338				0.589493				0.343718				0.19155
0.932241				0.792383				1.19538				0.629743				0.715823				0.502347
1.52359				0.870866				0.737516				0.80459				0.702812				0.2185
0.437857				0.852168				1.13094				0.653371				0.58665				0.309335
1.00899				0.647964				0.948268				0.80294				0.192308				0.410601
1.25403				0.368653				0.780125				0.516597				0.429822				0.561416
1.0198				0.951011				1.17341				0.287618				0.759952				0.368372
2.13441				0.465712				1.03203				0.23623				0.618977				0.558586
1.90828				0.854482				1.16442				0.689798				0.429256				0.251467
0.36181				1.05132				0.857455				0.404606				0.588526				0.320398
1.45599				0.315962				0.596044				0.659557				0.343965				0.440421
1.55936				1.16045				0.691096				0.646399				0.550433				0.186386
0.634694				0.265628				1.11766				0.561196				0.808604				0.46096
0.959409				1.03042				0.238655				0.690405				0.72552				0.329401
1.51774				1.03071				0.377644				0.542777				0.369243				0.48655
0.348525	2.58014	1.49163	0.674047	0.2357	1.16851	0.712095	0.284525	0.2241	1.19538	0.744467	0.285501	0.1884	0.880043	0.529566	0.20229	0.1909	0.819969	0.5194	0.189907	0.1604	0.561416	0.370894	0.115629

## Sheet: M5L4
RCGA				PSO				WOA				IWOA1				IWOA2				IWOA
0.419982				0.3783				0.3699				0.3222				0.2951				0.1795
1.42474				0.588667				0.729823				0.654437				0.397513				0.468369
0.444302				0.448507				0.949102				0.860915				0.466691				0.312083
0.892384				0.725554				0.584084				0.356877				0.757277				0.339792
0.842408				0.586365				0.37804				0.654393				0.542428				0.239125
1.31625				0.618933				0.813877				0.484198				0.507184				0.493095
1.0952				0.721883				0.602941				0.792517				0.389197				0.418783
0.747565				0.474703				1.15915				0.430718				0.803786				0.462295
1.337				0.778661				1.12596				0.573646				0.509014				0.487778
0.884704				0.949572				0.697438				0.545736				0.738456				0.20524
1.16913				0.575278				0.390632				0.791859				0.618146				0.543558
0.918902				1.01319				0.929945				0.706798				0.492821				0.370022
0.929176				0.438216				1.06818				0.44016				0.75562				0.468645
1.11122				0.696834				1.18023				0.502947				0.707148				0.463767
1.34598				0.381045				0.417388				0.398231				0.539201				0.49774
1.3978				0.556761				0.745515				0.703725				0.722438				0.239425
0.489303				0.379352				0.855738				0.646637				0.766783				0.354604
0.705297				0.53129				0.942625				0.418662				0.52045				0.416171
1.19142				0.493527				0.969979				0.406098				0.470623				0.536433
0.519248				0.595093				0.912099				0.592708				0.60834				0.499255
1.0991				0.519735				0.976219				0.838184				0.768645				0.522358
1.27065				0.490425				0.681726				0.635946				0.663685				0.402546
0.738782				0.862619				0.854998				0.340916				0.493264				0.402634
0.7759				1.10699				0.466754				0.352805				0.680952				0.506851
0.869399				1.13798				0.41799				0.779637				0.796004				0.19285
0.456735				0.557172				1.18712				0.578671				0.580077				0.518527
1.15865				0.768636				0.607471				0.53962				0.578656				0.33562
0.890438				0.68238				0.866168				0.770876				0.458433				0.193431
1.20442				0.801881				1.17244				0.529188				0.332498				0.4652
0.961854				0.592502				0.524858				0.624681				0.39064				0.238784
1.16521				0.43358				0.530915				0.726563				0.343919				0.234602
0.783651				0.731158				0.654865				0.817373				0.538432				0.411522
0.869978				0.518895				1.14803				0.508961				0.3				0.276941
0.45959				0.399413				0.695756				0.691597				0.775489				0.303619
0.943136				1.15035				0.59779				0.876102				0.632539				0.333346
1.21692				0.726523				0.496639				0.365365				0.295845				0.3351
0.622056				1.15591				0.701128				0.655744				0.311052				0.327373
1.25298				0.994865				0.682456				0.55737				0.404547				0.412993
0.813664				0.384243				0.479263				0.497851				0.533957				0.243402
0.656037				0.928247				0.732767				0.472111				0.361915				0.25152
0.999249				0.949202				0.446231				0.753331				0.29964				0.215733
1.2048				0.900016				0.88256				0.887682				0.676817				0.303248
1.05312				0.824953				0.379058				0.42821				0.481011				0.474179
0.538783				0.554685				0.848056				0.766047				0.704834				0.269144
0.958566				1.00291				1.02861				0.433452				0.524345				0.462986
1.00831				0.562707				0.566219				0.886058				0.524291				0.44478
0.573562				0.678218				0.743593				0.778045				0.320937				0.49504
1.19853				1.09879				0.844802				0.563246				0.321157				0.496533
0.961284				1.07085				0.421115				0.73634				0.342928				0.291831
0.560326				0.703748				0.783855				0.605365				0.606969				0.297957
0.727948				0.635482				0.905655				0.781868				0.421669				0.379768
0.817252				0.870503				0.554458				0.524768				0.736819				0.304057
1.02692				1.11437				1.06809				0.363817				0.745137				0.498012
1.22093				1.11349				1.17987				0.658001				0.800996				0.489762
0.564429				0.856722				1.07586				0.839369				0.551772				0.392775
0.677851				0.64725				0.791954				0.432298				0.410763				0.280189
1.13842				1.06817				0.60251				0.567871				0.41386				0.440089
1.30571				0.736067				0.992653				0.747873				0.576914				0.268966
1.31873				1.10965				0.567524				0.344465				0.695208				0.354265
1.30264				0.405132				1.16842				0.859902				0.477573				0.326751
0.420572				0.808873				0.887259				0.756119				0.537247				0.38573
0.604492				0.957731				0.870579				0.639722				0.630745				0.559223
1.13451				0.523301				0.513869				0.42666				0.776701				0.468674
1.30898				0.650454				0.445258				0.605135				0.379926				0.554916
0.420338				0.530103				0.582814				0.61644				0.670809				0.269398
0.927884				0.638643				1.08603				0.887129				0.598413				0.381885
1.02195				0.704899				1.12982				0.807927				0.522582				0.199195
0.672631				0.821926				0.953465				0.869038				0.759327				0.469308
0.701743				0.417715				0.974775				0.707974				0.501452				0.409998
1.30906				0.825294				0.561648				0.551469				0.389062				0.50771
0.772969				0.60054				0.850386				0.853455				0.6276				0.557911
1.28172				0.573602				1.04604				0.594643				0.6227				0.5354
0.641646				0.574932				0.706746				0.453904				0.467269				0.336303
0.933323				0.502969				1.19436				0.547372				0.716657				0.179631
1.29386				1.15175				0.444968				0.722825				0.819826				0.386602
0.674443				1.13497				0.637597				0.639573				0.810114				0.25904
0.565864				1.04039				0.796466				0.752118				0.361794				0.263464
1.20847				0.967245				0.420452				0.887832				0.417026				0.304251
1.35717				0.520479				0.975196				0.869054				0.307507				0.216239
0.791266				0.669732				0.834123				0.626225				0.614002				0.465731
1.20012				0.530974				0.811439				0.869871				0.353275				0.466104
0.679073				0.379269				1.06219				0.387899				0.509016				0.387529
1.22235				0.634188				1.08619				0.351433				0.75924				0.308971
0.664444				0.94408				1.02803				0.495131				0.58287				0.498201
1.03627				0.883944				0.635005				0.651865				0.488827				0.39108
1.3554				0.817474				0.747086				0.623894				0.404482				0.546143
0.579398				0.733349				0.997333				0.834266				0.526595				0.521366
1.39487				0.610742				0.461536				0.629341				0.797103				0.316005
0.967047				0.783992				0.461436				0.567651				0.360214				0.388717
1.23706				0.994162				0.59501				0.630543				0.542251				0.312244
1.41876				0.994859				0.8075				0.726994				0.744971				0.417971
1.20353				0.844156				1.18119				0.331675				0.31788				0.484528
1.30123				0.982935				0.962452				0.777283				0.658203				0.465095
1.34666				0.900344				0.630022				0.403174				0.809067				0.227568
1.26798				0.477948				0.613004				0.594069				0.443816				0.494395
0.766116				0.786207				1.07918				0.468134				0.365335				0.18913
0.660464				0.65913				1.13031				0.531918				0.654872				0.338185
0.945865				0.45282				0.90312				0.698215				0.772564				0.459556
1.31455				0.497866				0.582904				0.418572				0.615806				0.478688
0.647281				0.53856				0.443856				0.480605				0.767591				0.320134
0.419982	1.42474	0.957999	0.292694	0.3783	1.15591	0.728407	0.226513	0.3699	1.19436	0.782798	0.244526	0.3222	0.887832	0.616882	0.16362	0.2951	0.819826	0.554871	0.157658	0.1795	0.559223	0.381132	0.107785

## Sheet: L4
RCGA				PSO				WOA				IWOA1				IWOA2				IWOA
8.2224				1.8882				2.83221				1.45069				0.431261				0.460319
4.9519				3.89558				5.25189				0.704725				1.19413				0.569334
3.00788				4.22223				1.27389				2.41407				1.62809				1.33102
5.52103				3.23574				1.77902				2.07351				1.17554				0.883183
2.24691				3.17046				5.26407				1.69028				1.42521				1.29506
6.72007				3.83963				3.99446				0.991103				1.67863				1.44955
7.93192				4.87869				2.64448				2.28063				0.674588				1.07585
4.65182				1.19297				5.36427				2.7453				1.83982				1.06561
7.26732				5.20635				2.89853				1.47697				0.992189				0.65378
1.62826				2.71282				2.1834				2.91139				0.414983				1.17807
8.2013				4.82623				3.67656				2.41563				0.830319				0.911053
5.4512				2.78472				5.13447				2.63356				1.16238				0.959
2.95092				3.77567				1.51616				2.95084				0.981087				1.07903
8.33451				3.49462				1.99888				2.07258				1.33523				0.623402
3.68012				1.42124				2.57028				1.53677				0.995558				0.72697
7.45754				2.18477				1.27164				1.91921				0.740947				1.19874
3.93023				4.41588				5.59491				2.62493				1.36412				0.656427
6.87013				2.40613				1.58628				1.22832				0.873253				1.19699
2.95404				1.30516				1.02088				2.97095				0.638494				1.21864
6.48984				3.81138				4.12142				1.69				1.50287				1.20881
6.67555				5.71512				3.58839				2.52767				1.96014				0.945349
7.1907				0.84098				1.1753				2.69589				0.781215				0.946108
7.78057				4.65333				5.44473				2.73731				0.970615				1.24124
7.73092				4.73909				4.34308				2.62914				0.409025				1.19666
6.89529				5.65374				1.43185				1.58275				0.644944				1.05651
8.44619				3.41862				1.52485				1.14991				0.692645				0.677498
3.26101				2.3077				1.79015				1.62932				1.71966				0.449646
3.38351				1.4776				1.51655				2.09961				0.899187				1.06725
3.16746				4.42128				2.56618				2.98419				1.03095				1.09291
3.98166				2.98557				3.31039				0.926237				1.7912				0.933111
4.53278				2.19867				1.05221				1.70793				0.852801				1.16792
7.03557				3.20863				1.88563				1.46657				1.97398				0.389437
2.8536				5.73225				3.15672				1.85023				0.541326				1.12766
2.8558				3.94337				2.55254				1.77193				1.95721				1.04796
8.32117				5.87277				2.8446				0.992847				1.39148				0.675577
2.17088				3.51115				2.58018				1.4274				1.47531				1.20136
7.89973				2.52371				1.10286				0.940662				1.4662				1.22001
2.2101				1.71892				1.82196				2.42271				1.5166				1.05919
5.80602				2.0591				4.84724				0.565434				1.4215				1.36747
3.31652				1.87961				2.50791				0.710726				0.778661				0.970045
5.50602				6.00294				2.6133				1.50457				1.98131				1.1763
6.23461				2.94994				4.84883				1.22767				1.00498				0.6766
5.84634				4.87364				3.9984				2.25857				0.54609				0.648883
4.57967				1.28146				3.08386				1.70866				1.03017				1.04073
6.02287				2.76005				2.98574				1.5584				1.29906				0.566614
1.84769				5.09439				0.972381				1.86717				0.578228				1.37608
5.75583				1.33709				2.05774				1.15915				1.57141				0.349203
8.51986				2.61155				4.76631				1.53223				1.22953				1.47943
2.125				6.03839				3.04993				0.794168				1.3371				1.28373
7.69184				2.45165				3.15085				1.95193				0.584977				0.706097
2.33627				0.972092				5.09904				1.56726				1.03786				1.42225
1.88727				4.68331				5.63745				0.813071				0.853682				0.948748
3.25341				2.46163				3.53953				1.50077				1.17036				0.74436
6.95509				2.68987				1.44869				0.632111				1.46302				0.405892
5.32899				1.44446				3.72433				1.63366				1.89964				0.457215
3.33782				4.60911				3.65928				0.640801				1.94573				0.840306
4.11521				4.41367				4.84862				1.70744				1.11701				1.14491
6.06283				1.10125				2.88693				1.8149				1.65738				0.521734
7.47831				4.94652				3.07843				0.77579				1.17909				1.15585
4.28059				0.862976				5.25742				0.794455				1.83313				0.81715
1.79165				5.92318				5.21933				2.36931				1.39153				0.689596
7.19249				1.72141				4.82362				0.915855				1.93876				1.46896
3.57364				1.07368				3.91717				2.71765				1.14145				0.491407
6.38764				1.67485				5.04164				1.05403				0.702333				0.481003
4.84079				2.95638				0.899713				1.87194				1.54889				0.841746
6.13668				4.58434				5.47642				1.40277				1.69934				0.331552
7.32712				1.01417				4.10175				1.23976				1.50327				1.46526
4.52763				3.55689				3.35678				1.54146				1.74231				0.712686
3.41764				4.22501				1.31115				1.44782				2.01133				0.824045
2.77159				3.16407				1.15712				0.567809				0.41776				1.36455
8.01011				5.51481				1.88531				1.74334				1.30014				0.500219
8.01136				1.65443				3.93587				2.04119				1.51398				0.360439
4.25707				3.28676				4.07642				1.89003				1.40939				0.969904
6.93867				4.85827				3.31884				2.76686				1.93237				1.49473
3.86235				2.87168				3.27037				1.07315				1.81567				1.38928
5.81919				5.51356				3.46148				1.54743				1.45831				1.23886
6.32646				5.20682				2.32832				1.1363				1.07937				1.45539
4.30388				4.07039				3.47057				2.42316				0.781947				1.21093
3.25173				2.125				5.70527				0.738611				1.90959				0.359866
7.61765				1.68097				5.61237				1.39399				0.511632				1.15537
5.92717				5.2807				2.02901				1.11679				0.820058				1.37932
5.76973				0.969788				2.68965				1.78747				1.63936				1.28048
6.15403				5.36715				2.0865				0.974886				1.6474				1.16469
5.3392				1.42715				2.141				2.12282				1.24065				0.815342
3.97204				3.34903				1.97875				1.43054				1.47186				0.393797
6.553				3.2189				4.16056				0.685289				1.54581				1.11101
2.1893				4.30865				4.89847				1.32003				1.58621				1.50408
5.40925				3.16659				2.69419				2.66223				1.57836				1.17514
5.11214				2.84007				1.39132				1.21572				1.09249				1.06351
8.3086				1.56523				1.71814				2.46986				1.70315				1.27808
1.89869				1.36053				3.95894				2.12742				1.70468				1.36155
4.1451				2.18469				0.940052				2.8998				1.15097				0.950363
1.95763				4.49041				2.10788				2.80225				1.72213				1.49191
3.90527				5.10925				1.72492				2.06588				1.61408				0.595506
2.87812				3.15183				3.25684				0.667076				0.603916				0.687002
3.21878				3.77969				4.59871				1.34915				0.596719				1.17121
5.93684				3.38199				3.30213				1.92287				0.486464				0.399412
3.3377				4.95227				2.02192				2.15883				1.80422				1.166
2.13016				2.19303				3.973				2.41642				1.11931				1.49351
8.29162				6.0176				5.19614				1.16832				1.91985				0.935429
1.62826	8.51986	5.1195	2.04449	0.84098	6.03839	3.31907	1.50151	0.899713	5.70527	3.12966	1.39975	0.565434	2.98419	1.70289	0.671189	0.409025	2.01133	1.2633	0.459963	0.331552	1.50408	0.97559	0.33677

## Sheet: L6
RCGA				PSO				WOA				IWOA1				IWOA2				IWOA
4.33067				5.24036				2.6454				1.45102				0.691818				1.06458
3.4452				0.789891				1.31949				0.521605				0.979313				0.312563
5.07301				4.51549				2.06289				0.844906				0.922422				0.824075
2.98219				5.0069				1.20642				1.21712				1.62969				0.942117
4.74354				4.60487				2.24325				1.28236				0.697488				0.879859
5.38161				3.65445				1.28055				1.44063				0.9182				0.282155
3.68148				4.88079				3.66499				1.56325				0.613025				0.959583
6.40852				4.89457				2.59751				1.0432				0.550262				0.598878
6.56576				3.69938				3.47985				0.593673				0.605852				0.278352
2.20308				4.36923				3.58931				0.468016				0.397069				0.473748
6.48932				5.39459				3.30645				0.593378				1.11546				0.816387
3.5003				5.51155				3.17555				1.45531				1.55034				0.582262
3.24159				4.35586				2.07889				0.938277				1.0563				0.735384
3.91718				5.52098				2.44947				1.46777				1.00556				0.326137
4.60042				4.10415				3.38005				1.2301				0.541981				0.455503
6.63393				4.24317				3.21157				0.874364				0.66519				0.472655
3.86322				0.995896				2.39792				1.52918				0.757085				0.493153
2.09768				5.43197				1.7967				0.666243				0.887536				0.719309
5.24849				4.30282				1.26285				1.03997				0.953986				0.717884
5.22795				4.12842				1.19072				1.05583				1.0809				0.775277
5.86874				2.76555				3.32421				0.387846				1.18773				1.04977
3.43734				2.15666				1.77806				0.7943				1.23999				0.916465
5.75278				4.26376				2.4358				1.47237				1.43817				0.794974
2.04231				3.58407				1.18869				1.26295				0.743763				0.817616
5.05985				2.40555				2.57707				1.35368				0.943238				0.420558
4.62642				4.12085				3.34892				1.18661				0.69896				0.940211
3.69101				0.697414				3.59333				1.30069				0.672119				0.306683
3.0411				4.30113				2.14328				0.913837				1.06926				0.692836
2.60363				1.47986				0.947313				0.538336				0.831086				0.726007
3.00734				2.74537				3.39584				0.866855				0.954116				0.382655
7.26962				3.25851				2.17921				1.6118				1.04863				0.301266
6.1931				3.29204				1.88749				1.45576				1.58825				0.406389
6.46261				0.986067				2.63932				0.858961				0.399592				0.953221
5.0698				0.95152				1.77153				1.20662				0.827221				0.980922
3.49202				2.64751				1.91109				0.658664				0.439237				0.701844
3.38141				1.59312				1.88958				1.06263				1.59296				0.315183
6.54125				3.43395				2.01087				0.942951				1.28492				0.356927
1.70967				3.97745				3.66658				1.28557				0.400185				1.09682
3.21869				3.56877				0.921822				1.00587				1.13512				1.0842
3.60683				2.64486				2.90959				1.31693				0.799744				0.817108
3.01258				4.68134				2.09871				0.84133				1.34427				1.07824
4.61619				2.35838				1.77439				1.09458				1.07054				0.551659
5.87935				2.00276				2.5655				0.386317				1.2088				0.347648
2.74645				4.82269				1.94163				0.915954				1.1829				1.0175
2.5189				4.27108				1.06946				1.15868				0.878401				0.381202
6.32268				4.33832				2.67602				0.923417				1.01622				0.6547
1.4529				1.32761				2.65995				1.15807				1.41046				0.955168
7.14953				0.882331				2.8074				0.524795				0.500708				0.241697
5.27777				1.04857				1.60888				1.1181				1.14512				0.666976
2.13977				3.45205				1.95553				1.00399				1.05413				0.348738
5.61107				2.00789				2.54915				0.758108				1.26685				0.786645
6.17723				4.67397				2.93742				1.1855				0.928297				1.05909
4.56263				4.8384				1.01733				0.65442				1.06866				0.67677
5.51618				1.08207				0.668566				0.984849				1.64106				1.10202
4.90754				1.61135				1.34952				0.52351				0.910006				0.601592
2.97156				4.39391				2.46666				0.599517				1.67035				0.592755
5.44739				4.285				1.67837				0.992478				1.69005				1.05477
6.74224				4.8324				3.36223				1.1537				1.11639				0.81548
3.74781				0.7277				1.33649				1.58996				1.72817				0.409899
4.10134				4.3316				3.6131				1.35799				0.697126				0.885477
2.53481				2.37062				1.94232				0.664662				0.89466				1.09614
5.53264				4.66734				1.97867				1.14815				1.15414				1.07513
3.1094				0.846054				3.27209				0.605611				1.06961				0.537839
1.87115				2.44758				3.57232				1.15438				0.525239				0.557505
1.95081				0.733575				1.82135				0.856334				0.423435				0.696962
3.75533				2.76873				3.26558				1.30669				0.481451				0.315147
4.67492				4.80396				2.02578				1.35681				1.11966				1.11243
4.25088				1.93062				1.7201				1.07165				1.14054				0.327123
1.74387				3.68615				1.97068				1.46068				1.69459				0.689115
4.59135				4.50139				2.01506				0.973449				1.2362				0.870627
2.35127				1.39545				1.73812				1.23801				0.397976				0.955028
3.02544				5.3174				3.00128				1.62199				1.7292				0.866975
4.16557				4.19528				3.69564				1.05141				0.513942				0.734075
6.66378				4.11187				3.04764				1.34739				1.39274				0.352076
2.57788				0.717276				3.33158				0.882113				0.852612				1.0302
2.09478				1.89037				0.881959				0.721865				1.57451				0.887718
2.14653				4.7211				3.6079				1.57361				0.794928				0.777132
5.63631				2.33866				2.38331				0.931337				1.11464				0.347952
4.4324				3.29757				1.87712				0.766464				1.59954				1.02124
5.10645				4.31118				3.62592				1.52729				0.574727				0.565872
3.12009				5.01932				3.43437				0.589851				1.26336				0.284116
5.38427				1.68271				2.86094				1.50136				1.25168				0.574553
6.96682				2.56137				2.40888				1.42092				0.403877				0.460282
6.89099				1.01945				2.17645				0.763966				1.57967				0.357776
2.94819				3.30997				0.809885				1.16754				0.471308				0.559664
2.76615				2.89037				2.5658				0.88859				0.699926				0.982459
6.63844				2.92804				1.72395				1.19832				1.33995				1.09774
6.64663				5.39417				2.70278				0.882307				0.61217				1.05134
5.72144				5.244				1.25385				1.62801				1.06237				0.87921
3.43979				4.26225				3.51158				0.718833				1.56829				0.469354
6.26693				3.54398				1.30355				0.472182				1.59441				1.03799
7.21055				4.85679				2.67978				1.42571				0.382421				0.242973
3.38064				1.70464				1.72258				1.04883				1.17252				0.358006
5.59181				2.68285				2.40445				1.14319				1.35795				1.1189
5.98273				3.75362				0.706478				1.15601				1.59007				1.00983
6.52267				2.86826				3.50854				1.02326				1.58109				0.904528
3.56058				1.96219				2.8917				1.13358				1.161				1.08622
4.91104				5.21017				1.97891				1.12868				1.21911				0.576104
4.45571				2.06283				3.23668				1.23541				1.71581				0.406766
2.02265				3.29912				1.18036				0.737761				1.11137				0.966135
1.4529	7.26962	4.39255	1.59058	0.697414	5.52098	3.29797	1.44423	0.668566	3.69564	2.32832	0.842558	0.386317	1.62801	1.05209	0.320612	0.382421	1.7292	1.03865	0.385791	0.241697	1.1189	0.702398	0.275179

## Sheet: L8
RCGA				PSO				WOA				IWOA1				IWOA2				IWOA
1.31027				3.26955				0.930807				0.95952				1.11096				0.412255
3.69963				2.42709				2.86248				0.607072				0.894977				0.553778
2.04698				2.95238				0.892801				0.470022				0.670907				0.660935
2.61487				3.81181				1.67723				1.02616				1.25147				0.41167
1.85364				4.07955				2.85723				1.23242				0.587522				0.385563
2.89009				3.47784				1.85547				0.69864				1.16				0.310925
0.9065				2.46928				2.12442				0.887648				0.481486				0.67233
1.0322				0.997883				2.1946				1.1886				0.982009				0.641693
1.68181				3.58322				0.704033				1.11773				0.688595				0.30693
0.968611				2.02525				1.94681				0.455967				1.25225				0.611272
3.62523				4.82076				2.93449				0.852598				0.346329				0.653637
2.71299				2.00063				2.84999				1.00087				0.908502				0.709191
1.19544				0.782056				2.46479				0.569729				0.908196				0.420743
2.30428				0.705136				2.87297				1.16116				0.889558				0.457208
2.14608				2.50335				1.70084				0.460997				0.50416				0.17938
2.80079				0.809504				2.7846				0.427581				0.603549				0.182263
2.26582				0.647207				1.90099				0.85348				0.389248				0.529721
3.9865				1.88749				1.42379				1.1349				1.06216				0.382631
4.26155				3.16221				1.12338				1.14543				1.2204				0.454133
3.45087				3.1861				1.92089				0.455541				1.22175				0.413674
4.12825				0.702021				0.627785				0.894087				1.24835				0.492968
3.85314				3.2223				1.60621				1.02525				1.1333				0.718981
1.70438				2.92079				2.82351				0.612618				0.323424				0.264546
1.77295				4.71985				0.664026				0.730157				0.979549				0.804483
1.09867				1.83358				0.659776				0.382798				0.710899				0.236816
2.50648				3.92513				1.09231				0.864665				1.06056				0.568138
2.34376				2.54712				2.21675				0.578274				1.28112				0.357168
1.89155				3.44839				1.02175				1.11167				1.03758				0.291688
1.97938				4.78297				1.29887				0.812019				0.772971				0.774417
2.96827				3.02926				0.691831				0.813515				1.01621				0.78795
1.09032				4.31923				2.55037				0.601124				1.30203				0.780416
1.39062				3.64734				2.51077				0.330822				1.07736				0.453588
1.31074				1.92501				2.01391				1.00636				0.699825				0.771355
1.50895				0.617964				1.21182				0.529561				0.599735				0.503891
2.10879				3.92834				1.49158				0.531097				0.730356				0.625721
3.76879				1.13294				2.23306				0.564955				0.76731				0.213716
2.53323				3.16579				0.937556				0.392769				0.945446				0.627739
1.50246				4.7223				0.67305				1.05337				0.90143				0.27948
3.76516				1.02697				2.57107				1.22344				0.940261				0.218548
4.04152				4.51102				2.53125				0.935418				0.511165				0.632098
2.86635				2.6176				1.96717				0.770638				0.454724				0.693039
3.98988				4.77922				1.79246				0.888454				1.35573				0.195861
1.3552				3.6063				0.684179				1.15939				0.284358				0.246102
3.66225				3.66442				1.73298				0.535167				1.05125				0.280533
1.20556				3.10959				2.11763				0.825989				0.565978				0.232575
3.67576				3.66164				1.88976				0.525013				0.865286				0.274037
1.41973				1.25861				1.15049				0.979074				0.502084				0.513583
2.00049				3.45556				0.5163				0.405916				1.25264				0.693332
1.93019				1.6354				1.92323				0.716399				1.01867				0.618111
4.11264				3.22221				2.21167				0.507954				0.829446				0.52855
1.76888				3.66128				1.02826				0.530615				1.08476				0.172
1.9762				4.37165				0.891786				0.784769				1.16504				0.573993
2.17375				2.05804				2.21928				0.409101				0.907896				0.422678
1.8576				2.83925				1.95988				0.885922				1.34639				0.589516
2.96255				0.861977				0.667142				0.799005				0.702026				0.612246
1.525				3.47008				2.7585				1.05394				1.17291				0.305003
2.30369				2.66324				0.898967				0.465572				0.482954				0.516196
0.993248				1.81648				0.660379				1.06035				0.854133				0.213946
2.28421				1.62744				1.44018				1.03213				0.932104				0.306577
3.6388				0.76516				2.2844				0.493229				1.14871				0.714663
1.51134				4.61418				2.46777				0.547037				1.26581				0.548008
1.23439				1.19244				2.86724				1.13207				1.23885				0.272291
2.45704				3.16459				1.8718				1.1201				0.974479				0.252249
2.24771				1.36427				0.831353				0.90241				0.631923				0.484162
2.7587				4.08431				1.62879				0.894369				0.955822				0.31359
1.93002				0.827522				1.97918				0.53312				0.6863				0.572378
1.53265				1.91727				2.7983				0.760586				0.710268				0.516064
4.46409				4.19087				2.46729				0.322499				0.821178				0.565022
2.26924				2.86335				2.47086				1.23559				0.347487				0.211151
3.60576				4.27412				1.22252				1.16554				1.11079				0.562108
4.32187				2.45673				1.32869				0.545978				0.965976				0.731158
3.80274				3.46927				1.72528				0.936249				0.481095				0.685104
3.28032				4.83814				0.763512				0.585029				0.857014				0.319237
2.62616				0.626485				2.64115				0.63157				0.307614				0.71334
3.49801				3.59416				0.644733				0.561733				1.25891				0.710299
2.0882				2.59862				1.34963				0.774028				0.698826				0.776045
2.90037				1.26869				0.769086				1.24854				0.441911				0.650126
1.30084				1.15213				1.551				0.495988				0.632745				0.575681
3.61547				1.81167				1.80732				0.352506				1.05716				0.79791
4.25039				4.19574				1.08822				0.638169				0.561691				0.766266
1.40808				3.56343				0.637577				1.06032				0.741266				0.439745
4.52337				2.91244				1.08229				1.24294				0.629843				0.649852
2.52346				3.7206				2.33159				0.48072				0.600978				0.585094
1.78886				0.833016				2.6885				0.455145				1.00712				0.467083
2.10037				2.68516				1.34565				0.488117				0.342919				0.795927
2.26059				3.42591				1.8331				1.18706				0.954162				0.695136
3.46677				2.39026				1.86687				0.40529				0.518777				0.744422
4.27258				2.05535				1.15956				0.926815				0.380665				0.667503
3.50877				3.13851				1.68447				0.684321				1.17105				0.625498
1.20378				0.5211				1.76296				0.826946				0.614094				0.309953
3.67485				0.75676				1.83804				1.02568				1.07182				0.453758
3.07518				2.61176				1.92761				0.414007				1.18573				0.615094
1.606				3.82478				1.82499				0.385612				1.3475				0.462822
3.48152				3.79514				0.691017				0.887357				1.34866				0.469409
2.54032				1.99387				2.66916				1.02984				0.525145				0.466438
2.54912				3.50339				0.70595				0.376986				0.33349				0.468996
1.16948				1.26923				2.40424				1.00182				0.787304				0.224538
1.47514				4.61514				2.35237				0.449941				0.535728				0.29189
2.5571				1.23833				0.841043				0.715127				1.34107				0.283405
2.16262				3.22863				1.52239				0.408588				0.563082				0.682374
0.9065	4.52337	2.49767	1.00654	0.5211	4.83814	2.71459	1.25212	0.5163	2.93449	1.69688	0.713585	0.322499	1.24854	0.763644	0.274793	0.284358	1.35573	0.851563	0.301977	0.172	0.804483	0.498773	0.184471

## Sheet: M5L6
RCGA				PSO				WOA				IWOA1				IWOA2				IWOA
0.8624				0.2529				0.2102				0.1972				0.1936				0.490245
0.5332				1.08637				0.766209				0.763444				0.731358				0.242971
0.6696				0.479516				1.138				0.563849				0.631022				0.217048
0.4775				0.373957				0.926077				0.678524				0.653289				0.491855
0.3313				0.463136				0.691237				0.344439				0.601157				0.419695
1.3691				0.579848				0.845269				0.573802				0.517044				0.174653
1.757				0.521066				1.09233				0.684187				0.398082				0.521396
1.016				1.11927				0.407705				0.8602				0.608203				0.371409
0.5589				0.300832				0.603115				0.505357				0.267255				0.382896
1.3931				0.80651				1.19622				0.256398				0.286208				0.407299
1.7853				0.405064				0.610057				0.236948				0.205983				0.467988
0.8605				1.03605				0.864972				0.633535				0.797729				0.505392
1.4511				0.409419				1.10596				0.749111				0.801539				0.319188
1.6013				0.722006				1.19941				0.676334				0.271199				0.20166
0.361				1.18637				0.859314				0.436567				0.486432				0.457519
1.6635				0.584886				0.317964				0.853533				0.605019				0.299137
0.4853				0.296875				0.24609				0.557796				0.375401				0.499245
1.3865				0.45248				0.824459				0.858383				0.666317				0.314796
0.7024				0.624522				0.773828				0.248216				0.543261				0.4947
1.0246				0.564579				1.1662				0.340715				0.461612				0.237866
1.2429				0.467372				0.95168				0.734449				0.360997				0.219344
1.8226				1.12733				0.868608				0.830915				0.665816				0.515062
0.9561				0.891067				0.730269				0.739664				0.756433				0.185672
1.4214				1.15161				0.468483				0.402064				0.64997				0.438936
1.8163				0.662011				1.16623				0.302459				0.448479				0.45748
0.3843				1.13127				0.747055				0.784972				0.781455				0.34059
1.4053				0.25835				0.240282				0.741261				0.353625				0.317995
0.9846				0.822988				0.902197				0.38494				0.527627				0.1683
0.8574				1.00118				0.726694				0.355118				0.791754				0.325543
1.2426				0.470528				0.268865				0.419733				0.361344				0.341778
1.7845				1.12392				1.09472				0.772252				0.350278				0.230098
0.931				0.965864				0.538355				0.767137				0.774787				0.29679
0.4339				1.02489				0.438477				0.592797				0.236567				0.292072
1.4846				0.788572				0.323442				0.593592				0.381174				0.520823
1.6841				0.993251				0.519195				0.395468				0.564227				0.265652
1.1699				0.560257				0.437216				0.681839				0.320967				0.290739
1.4479				0.461636				0.858155				0.749166				0.591981				0.329435
1.4427				0.5447				0.27595				0.50331				0.693779				0.447327
1.7781				0.798903				0.483924				0.506517				0.507916				0.224908
0.4521				1.02812				0.490273				0.519997				0.601334				0.511688
1.2933				0.524221				1.08481				0.39063				0.692266				0.201072
1.4619				0.628926				0.651776				0.66537				0.339809				0.350271
1.0639				1.05815				0.961427				0.82362				0.570026				0.180276
0.8959				0.827128				0.809756				0.82699				0.264058				0.465136
1.6495				1.17877				0.98861				0.715157				0.516727				0.444187
0.4729				0.443175				0.323424				0.377787				0.718507				0.252839
1.4914				1.0256				1.1827				0.675257				0.770475				0.43625
1.7493				0.884222				1.05354				0.288585				0.50574				0.387929
1.0047				0.485444				0.260532				0.282811				0.367523				0.503553
0.8664				0.697331				0.673511				0.329534				0.602404				0.388431
0.3993				0.625676				0.533834				0.298221				0.768288				0.523689
1.7598				0.812835				0.836498				0.602752				0.513014				0.333632
0.8899				1.00067				0.439071				0.248054				0.803931				0.309438
1.2934				0.351045				0.78649				0.767237				0.317195				0.36101
1.4333				1.02021				0.809617				0.698316				0.263257				0.269175
0.7076				1.03856				0.80636				0.839005				0.379892				0.534486
1.7555				0.584044				0.655848				0.538697				0.441956				0.352249
1.5403				0.654628				0.245404				0.651165				0.457203				0.268404
1.8123				0.787429				0.720829				0.814234				0.388739				0.338243
0.677				0.90754				0.615402				0.570506				0.628293				0.445167
0.9014				0.946441				0.317576				0.392825				0.251158				0.326858
1.2567				0.96084				0.667224				0.873734				0.445509				0.239963
1.094				0.616385				0.658287				0.22245				0.378531				0.505749
1.8255				0.653911				0.757923				0.423353				0.38562				0.398534
1.8158				1.14622				1.01061				0.871693				0.259734				0.315527
1.5909				0.788113				0.906705				0.450241				0.565633				0.25567
1.4008				1.04663				1.07703				0.411503				0.370729				0.254606
0.5433				0.511034				0.262069				0.281016				0.290846				0.374112
0.6474				0.834212				0.428519				0.832009				0.194013				0.339112
1.6544				0.802489				0.666992				0.291113				0.371273				0.460448
0.6232				1.15288				1.16279				0.427424				0.538683				0.196064
1.0089				0.333142				0.995347				0.819333				0.73922				0.502234
0.5858				0.720416				0.659273				0.543557				0.220072				0.436241
0.9456				0.740117				0.541561				0.623718				0.760408				0.222154
1.3575				0.337124				0.268929				0.601428				0.275655				0.506596
1.2935				1.09795				0.946512				0.68123				0.715931				0.247055
1.4351				1.07901				0.713852				0.217533				0.695093				0.407653
1.6542				0.66296				0.408886				0.563128				0.768652				0.382314
0.6578				0.983107				0.634745				0.219433				0.279621				0.232272
1.0949				0.391581				0.377844				0.770575				0.509815				0.170528
1.1998				0.83187				0.957234				0.432878				0.447306				0.472342
0.7448				0.496349				0.576267				0.78414				0.302343				0.469703
0.8035				0.669187				1.14618				0.367775				0.553953				0.334243
0.4304				1.04128				0.227266				0.60029				0.573396				0.19069
1.7042				0.436175				1.03412				0.847198				0.32795				0.399143
0.5722				0.536728				0.832906				0.230326				0.519338				0.236935
1.3636				0.704345				0.745606				0.234617				0.813325				0.455445
0.622				0.56845				0.856674				0.211492				0.500532				0.378864
1.4312				0.998766				0.932324				0.669601				0.628938				0.268033
0.5324				1.17531				0.304103				0.612169				0.451356				0.529712
1.3178				0.401466				1.08233				0.276246				0.215388				0.467104
0.3528				0.474169				0.224473				0.749157				0.377059				0.517879
0.7634				0.908859				0.502678				0.625494				0.695703				0.195413
1.8225				0.603628				0.388999				0.245872				0.410683				0.240628
1.5252				1.16244				1.13075				0.245224				0.245797				0.45878
0.5015				1.16113				0.277958				0.29148				0.513808				0.442875
1.8135				0.854178				0.78769				0.744059				0.423421				0.474513
1.0615				1.05632				0.843401				0.261251				0.656884				0.3661
0.7137				0.628299				0.857431				0.362091				0.52235				0.335988
0.3745				0.843187				1.06946				0.366097				0.697632				0.409189
0.3313	1.8255	1.12287	0.467301	0.2529	1.18637	0.754318	0.268028	0.2102	1.19941	0.710547	0.290181	0.1972	0.873734	0.538749	0.21035	0.1936	0.813325	0.500249	0.177474	0.1683	0.534486	0.359999	0.108166
